# Supplementary material for: A multicellular spheroid formation and extraction chip using removable cell trapping barriers
Source: Royal Society of Chemistry journal article supplement (doi:10.1039/c0lc00134a), 2010-11-01
Supplement: c0lc00134a.pdf [file c0lc00134a.pdf]

(Supplemental information)

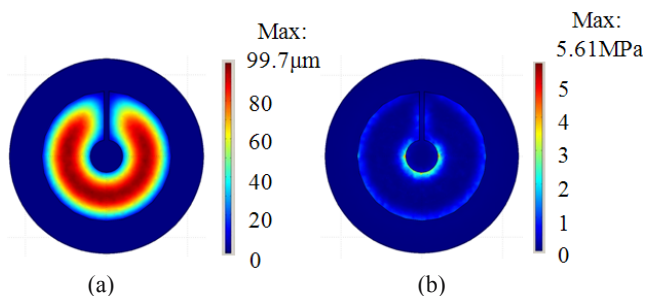

**Fig. S1** Numerical simulation of the cell trapping barrier formed at the membrane pressure of 50kPa, resulting in (a) the membrane deflection (horseshoe height) of 99.7 μm; (b) the maximum stress of 5.61 MPa at the inner membrane edge.

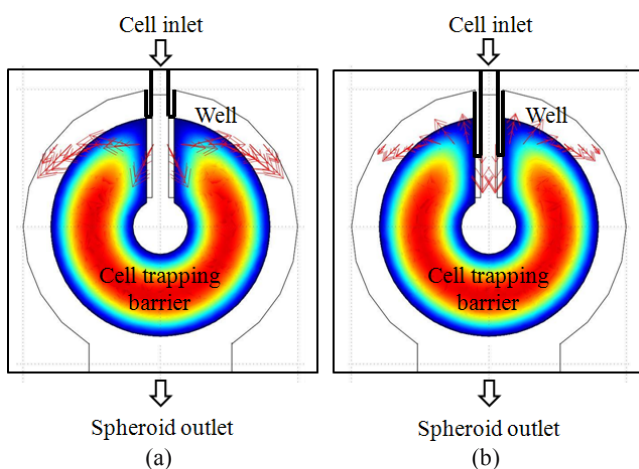

**Fig. S2** Numerical simulation of the inlet flow velocity vector depending on the length of the 60 μm-wide, 100 μm-high inlet guides, when the cell inlet pressure of 100 Pa is applied in the presence of 100 μm-high cell trapping barrier: (a) 100 μm-long inlet guide; (b) 250 μm-long inlet guide.
